# Supplementary material for: Comparative genomics and bioinformatics approaches revealed the role of CC-NBS-LRR genes under multiple stresses in passion fruit
Source: Front Genet. 2024 Feb 26;15:1358134. doi: 10.3389/fgene.2024.1358134 (PMC10929019; doi:10.3389/fgene.2024.1358134)
Supplement: Supplementary file 1 [file Table2.XLSX]

## Sheet: Yellow Passion characteristic
subject id,	Length	MW	pI	II	AI	GRAVY	subcellular localization
Pe5g01191.1	796	90759.3	6	44.87-unst	106.87	-0.089	Cytoplasm
Pe4g01155.1	806	90673	6.33	46.05-unst	100.27	-0.141	Cell membrane, Cytoplasm
Pe4g01156.1	604	68424.3	7.55	46.81-unst	102.83	-0.216	Chloroplast
Pe4g02976.1	821	92686.8	5.88	42.58-unst	108.28	-0.039	Cytoplasm
Pe6g00077.1	1231	140603	5.87	50.76-unst	102.61	-0.249	Cell membrane, Cytoplasm
Pe5g02057.1	1060	120234	6.67	42.35-unst	100.34	-0.181	Cytoplasm
Pe1g01315.1	1033	117366	6.1	44.5-unst	104.52	-0.024	Cytoplasm
Pe1g01316.1	1078	122888	6.05	46.34-unst	101.08	-0.078	Cytoplasm
Pe9g01023.1	890	100590	5.31	47.8-unst	102.09	-0.108	Cytoplasm
Pe2g04052.1	1478	168831	6.06	55.29-unst	98.13	-0.266	Cytoplasm
Pe2g04014.1	1111	127594	6.69	51.92-unst	51.92	-0.164	Cell membrane, Cytoplasm
Pe8g03825.1	894	101724	6.42	46.3-unst	94.41	-0.176	Cytoplasm
Pe8g03829.1	892	101795	7.12	44.98-unst	94.07	-0.201	Cytoplasm
PeNg01115.1	1078	122854	5.77	42.65-unst	98.11	-0.29	Cytoplasm
Pe6g00144.1	1133	129634	6.44	49.71-unst	98.93	-0.314	Cell membrane, Cytoplasm
Pe8g03593.1	923	105072	6.77	50.77-unst	103.29	-0.165	Cytoplasm
Pe8g03595.1	920	105351	6.74	54.12-unst	104.37	-0.15	Cytoplasm
Pe8g03587.1	957	109614	6.05	52.07-unst	105.31	-0.16	Cytoplasm
Pe8g03594.1	757	86597.1	7.88	49.94-unst	102.1	-0.182	Cytoplasm
Pe5g01091.1	849	96929.6	6.09	41.63-unst	96.86	-0.238	Cytoplasm
Pe8g00880.1	1128	129029	7	47.25-unst	100.58	-0.183	Cell membrane, Cytoplasm
