# Supplementary material for: Comparative genomics and bioinformatics approaches revealed the role of CC-NBS-LRR genes under multiple stresses in passion fruit
Source: Front Genet. 2024 Feb 26;15:1358134. doi: 10.3389/fgene.2024.1358134 (PMC10929019; doi:10.3389/fgene.2024.1358134)
Supplement: Supplementary file 2 [file Table3.XLSX]

## Sheet: Sheet1
Gene 1	Gene 2	Ka	Ks	Ka/Ks	Time (MYA)	Duplication type
PeCNL6	PeCNL7	0.0109	0.0141	0.77305	1.0747	Tandem
PeCNL8	PeCNL16	0.0997	0.1295	0.76988	9.87043	Segmental
PeCNL8	PeCNL18	0.1372	0.1334	1.02849	10.1677	Segmental
PeCNL8	PeCNL20	0.112	0.1411	0.79376	10.7546	Segmental
PeCNL8	PeCNL15	0.1554	0.2216	0.70126	16.8902	Segmental
PeCNL8	PeCNL19	0.156	0.2553	0.61105	19.4588	Segmental
PeCNL8	PeCNL14	0.2472	0.4424	0.55877	33.7195	Tandem
PeCNL8	PeCNL13	0.245	0.4444	0.55131	33.872	Tandem
PeCNL9	PeCNL11	0.1077	0.1561	0.68994	11.8979	Tandem
PeCNL9	PeCNL10	0.1271	0.1658	0.76659	12.6372	Tandem
PeCNL10	PeCNL11	0.0403	0.054	0.7463	4.11585	Tandem
PeCNL12	PeCNL17	0.1092	0.1316	0.82979	10.0305	Segmental
PeCNL13	PeCNL14	0.008	0.0102	0.78431	0.77744	Tandem
PeCNL13	PeCNL15	0.1851	0.3008	0.61536	22.9268	Segmental
PeCNL13	PeCNL19	0.1975	0.3466	0.56982	26.4177	Segmental
PeCNL13	PeCNL20	0.217	0.4121	0.52657	31.4101	Segmental
PeCNL13	PeCNL16	0.2226	0.4771	0.46657	36.3643	Segmental
PeCNL13	PeCNL17	0.3531	0.6479	0.54499	49.3826	Segmental
PeCNL14	PeCNL15	0.1843	0.2967	0.62117	22.6143	Segmental
PeCNL14	PeCNL19	0.1967	0.3422	0.57481	26.0823	Segmental
PeCNL14	PeCNL20	0.2194	0.4087	0.53682	31.1509	Segmental
PeCNL14	PeCNL16	0.2211	0.4749	0.46557	36.1966	Segmental
PeCNL14	PeCNL18	0.245	0.4832	0.50704	36.8293	Segmental
PeCNL14	PeCNL17	0.3575	0.6704	0.53326	51.0976	Segmental
PeCNL15	PeCNL19	0.0583	0.1065	0.54742	8.11738	Tandem
PeCNL15	PeCNL16	0.1347	0.2146	0.62768	16.3567	Tandem
PeCNL15	PeCNL20	0.1203	0.2223	0.54116	16.9436	Tandem
PeCNL15	PeCNL18	0.1841	0.2402	0.76644	18.3079	Tandem
PeCNL16	PeCNL18	0.1294	0.1585	0.8164	12.0808	Tandem
PeCNL16	PeCNL20	0.1074	0.1726	0.62225	13.1555	Tandem
PeCNL16	PeCNL19	0.1196	0.2337	0.51177	17.8125	Tandem
PeCNL18	PeCNL20	0.1403	0.178	0.7882	13.5671	Tandem
PeCNL18	PeCNL19	0.1746	0.2603	0.67076	19.8399	Tandem
PeCNL19	PeCNL20	0.136	0.2876	0.47288	21.9207	Tandem
