# Supplementary material for: Comparative genomics and bioinformatics approaches revealed the role of CC-NBS-LRR genes under multiple stresses in passion fruit
Source: Front Genet. 2024 Feb 26;15:1358134. doi: 10.3389/fgene.2024.1358134 (PMC10929019; doi:10.3389/fgene.2024.1358134)
Supplement: Supplementary file 4 [file Table6.XLSX]

## Sheet: CMV heatmap
Gene name	Control	CMV
PeCNL1	0.736966	0
PeCNL2	8.8371	9.03067
PeCNL3	10.0892	9.66948
PeCNL4	8.23202	8.53787
PeCNL5	5.89885	5.70966
PeCNL6	5.12928	5.53398
PeCNL7	7.30986	7.77259
PeCNL8	7.67478	7.77039
PeCNL9	10.5375	10.5311
PeCNL10	9.03709	9.54689
PeCNL11	8.87652	9.06429
PeCNL12	5.60486	6.41504
PeCNL13	12.24	11.7061
PeCNL14	12.2535	11.5785
PeCNL15	4.5025	4.92283
PeCNL16	4.29768	4.08746
PeCNL17	4.73697	6.88264
PeCNL18	6.45943	7.03342
PeCNL19	7.57238	7.28232
PeCNL20	6.26053	6.35755
PeCNL21	11.0591	10.9581
PeCNL22	9.58496	9.27612
PeCNL23	10.9675	11.6652
PeCNL24	9.44708	9.54689
PeCNL25	9.21027	9.1404

## Sheet: Cold heatmap
Gene name	Control_T	Cold_T	Control_H	Cold_H
PeCNL1	0	1.58496	0.736966	1.22239
PeCNL2	8.69928	8.60979	8.7039	8.91687
PeCNL3	9.77479	9.04348	9.8933	9.8413
PeCNL4	8.40798	8.16323	7.97346	7.90889
PeCNL5	6.85383	6.8413	6.3634	6.96193
PeCNL6	6.89482	6.44846	6.49719	6.03709
PeCNL7	8.79008	8.18157	8.93762	8.43463
PeCNL8	9.96819	9.00562	7.71653	8.05166
PeCNL9	10.3461	10.8175	10.3242	11.2394
PeCNL10	10.0954	9.70908	9.76984	9.86212
PeCNL11	9.41715	9.03434	9.94056	10.015
PeCNL12	5.22239	5.66297	6.49719	5.96193
PeCNL13	10.0426	10.5272	10.7471	11.0258
PeCNL14	10.0764	10.4639	10.7437	10.9981
PeCNL15	7.50779	7.69116	4.1964	4.8413
PeCNL16	5.5025	5.23522	3.62449	3.5025
PeCNL17	6.58496	5.8413	7.835	5.32193
PeCNL18	6.89482	8.04621	6.12928	7.14296
PeCNL19	7.68182	7.31892	7.2062	6.75489
PeCNL20	7.60979	7.1565	5.84967	6.61961
PeCNL21	11.1826	10.4757	10.8662	11.0272
PeCNL22	8.44294	8.73019	9.13614	9.40656
PeCNL23	11.3189	10.7563	11.8961	11.4372
PeCNL24	10.5812	9.9386	10.222	10.0853
PeCNL25	8.92382	9.39232	8.50912	9.40372
