# Supplementary material for: Comparative genomics and bioinformatics approaches revealed the role of CC-NBS-LRR genes under multiple stresses in passion fruit
Source: Front Genet. 2024 Feb 26;15:1358134. doi: 10.3389/fgene.2024.1358134 (PMC10929019; doi:10.3389/fgene.2024.1358134)
Supplement: Supplementary file 5 [file Table4.XLSX]

## Sheet: predicted cis-elements
					Hormone								Stress responsive												Growth and development
Gene name	ABRE	CGTCA-motif	TGACG-motif	TCA-element	TATC-box	GARE-motif	P-box	TGA-element	AuxRR-core	TGA-box	ARE	GC-motif	TC-rich repeats	MBS	LTR	WUN-motif	MSA-like	circadian	HD-Zip 1	GCN4_motif	G-box	GT1-motif	Sp1	3-AF1 binding site	MRE	Box 4	ATCT-motif	CAG-motif	I-box	TCT-motif	chs-CMA1a	TCCC-motif	GTGGC-motif	GATA-motif	LAMP-element	GA-motif	chs-CMA2a	AE-box	ACE	CAT-box	RY-element	O2-site	ATC-motif	AT1
PeCNL1	1		2								1		1	1	2				1		3	2			1	2	1		1											1
PeCNL2		2	2					1			1				1															1													1
PeCNL3	1	1	1																		1					2	1				1	1
PeCNL4	1												1								1	2				1				1		1			1			1		1
PeCNL5		2	2	1					1					1								2			1	1
PeCNL6	1	1	1				1						1	1	1			1			1					2							1					1
PeCNL7						1					1				1							2				1									1
PeCNL8						1	1																			2				2
PeCNL9	2	2	2											1	1						3	2				1
PeCNL10	4	1	1		1			1	1		6			1							5				1	1			1									1
PeCNL11	1	3	3	1	1						1						1				2	1			1					1											1	1
PeCNL12				1							2		1			1		1							1						1								1
PeCNL13	2										2	1		2							2					1	1			2		1	1	1
PeCNL14	2								1		2			1	1					1	2					3				1		1	1	2
PeCNL15	1	2	2																1	1	2		1			2									2
PeCNL16	2										3				2			1		1	1	2				1												1
PeCNL17	1	1	1			1				1			1								2	1		1		1				1			1			2					1
PeCNL18	2												1								2					1				3						1
PeCNL19																									1	3	1	1
PeCNL20	2										1				2						2					2
PeCNL21		2	2	1							3		1													1				1							1
PeCNL22	3										2				1						4	1	1		2															1				1
PeCNL23	1	1			1						2						1					1	1		1	2								1		1
PeCNL24	4		2										1	1					1		5	1				1									1								1
PeCNL25							1				1			1	2			3			1				1	1								1			1					1
