# Supplementary material for: Comparative genomics and bioinformatics approaches revealed the role of CC-NBS-LRR genes under multiple stresses in passion fruit
Source: Front Genet. 2024 Feb 26;15:1358134. doi: 10.3389/fgene.2024.1358134 (PMC10929019; doi:10.3389/fgene.2024.1358134)
Supplement: Supplementary file 6 [file Table1.XLSX]

## Sheet: Purple passion charcateristic
Protein ID	Gene name	Group	Chr	Start	End	Strand	Length	MW	pI	II	AI	GRAVY	Subcellular localization	CC
ZX.01G0023360	PeCNL3	A	Chr1	29874404	29877968	+	815	92058.1	5.9	40.81-unst	108.48	-0.047	Cytoplasm	P
ZX.05G0014000	PeCNL21	A	Chr5	97677189	97685253	+	741	84156.4	5.98	48.55-unst	104.86	-0.168	Cytoplasm	P
ZX.01G0000680	PeCNL1	A	Chr1	1891880	1896154	-	796	90738.2	5.85	45.2-unst	106.87	-0.09	Cytoplasm	P
ZX.02G0028760	PeCNL7	B	Chr2	100934305	100938050	+	1033	117366	6.1	44.5-unst	104.52	-0.024	Cytoplasm	P
ZX.02G0026620	PeCNL6	B	Chr2	90146953	90149932	+	788	89531.3	5.7	41.08-unst	104.25	0.033	Cell membrane. Cytoplasm	P
ZX.09G0002000	PeCNL25	B	Chr9	16165531	16168203	-	890	100739	5.38	47.99-unst	101.65	-0.112	Cytoplasm	P
ZX.08G0029810	PeCNL23	B	Chr8	57792698	57800177	-	1541	175592	6.08	45.44-unst	93.72	-0.182	Cytoplasm	P
ZX.01G0003360	PeCNL2	C	Chr1	11553647	11556196	+	849	96929.6	6.09	41.63-unst	96.86	-0.238	Cytoplasm	P
ZX.01G0055630	PeCNL4	C	Chr1	55120673	55125091	-	944	106234	8.94	49.93-unst	96.35	-0.112	Cytoplasm	P
ZX.08G0032940	PeCNL24	C	Chr8	62402027	62404777	+	916	104924	6.69	49.34-unst	102.58	-0.191	Cytoplasm	P
ZX.01G0140300	PeCNL5	C	Chr1	271501550	271504396	+	948	108632	9.09	47.04-unst	103.9	-0.186	Cytoplasm	P
ZX.08G0019500	PeCNL22	C	Chr8	49918092	49921478	+	1128	129009	7.12	46.28-unst	102.04	-0.173	Cell membrane, Cytoplasm	P
ZX.03G0013110	PeCNL9	C	Chr3	83195995	83200969	-	1136	128905	8.3	48.35-unst	101.16	-0.168	Cell membrane, Cytoplasm	P
ZX.03G0013140	PeCNL11	C	Chr3	83240134	83243472	-	1112	126185	7.18	47.98-unst	101.6	-0.177	Cytoplasm	P
ZX.03G0013120	PeCNL10	C	Chr3	83231759	83235100	-	1113	126295	6.35	49.91-unst	101.52	-0.192	Cell membrane, Cytoplasm	P
ZX.04G0021310	PeCNL17	C	Chr4	76694698	76698207	-	1169	132293	6.47	45.56-unst	101.33	-0.211	Cell membrane. Cytoplasm	P
ZX.03G0014530	PeCNL12	C	Chr3	86912705	86915887	-	1060	120401	6.75	43.4-unst	99.78	99.78	Cell membrane, Cytoplasm	P
ZX.03G0022840	PeCNL14	C	Chr3	119528532	119532536	+	1134	129425	6.08	40.97-unst	95.34	-0.331	Cytoplasm	P
ZX.03G0022810	PeCNL13	C	Chr3	119507466	119510756	+	1096	124871	6.03	43.05-unst	96.94	-0.318	Cytoplasm	P
ZX.04G0024190	PeCNL19	C	Chr4	86815716	86820434	+	1234	141056	5.86	50.93-unst	99.6	-0.231	Cytoplasm	P
ZX.04G0020330	PeCNL15	C	Chr4	73799636	73803593	+	1115	127424	5.8	52.01-unst	98.81	-0.274	Cytoplasm	P
ZX.04G0024450	PeCNL20	C	Chr4	87284402	87288034	-	1210	138384	5.65	51.03-unst	103.18	-0.236	Cell membrane. Cytoplasm	P
ZX.04G0020830	PeCNL16	C	Chr4	75055257	75059184	-	1100	125598	5.89	43.16-unst	97.08	-0.269	Cytoplasm	P
ZX.03G0012600	PeCNL8	C	Chr3	81469741	81474689	-	1281	144947	5.87	44.91-unst	103.19	-0.233	Cell membrane, Cytoplasm	P
ZX.04G0021870	PeCNL18	C	Chr4	78625893	78629660	+	1083	123326	5.12	47.8-unst	97.11	-0.279	Cytoplasm	P
