# Supplementary material for: Comparative genomics and bioinformatics approaches revealed the role of CC-NBS-LRR genes under multiple stresses in passion fruit
Source: Front Genet. 2024 Feb 26;15:1358134. doi: 10.3389/fgene.2024.1358134 (PMC10929019; doi:10.3389/fgene.2024.1358134)
Supplement: Supplementary file 7 [file Table5.XLSX]

## Sheet: miRNA target gene prediction
miRNA_Acc.	Target_Acc.	Expectation	UPE$	miRNA_start	miRNA_end	Target_start	Target_end	miRNA_aligned_fragment	alignment	Target_aligned_fragment	Inhibition	Target_Desc.	Multiplicity
ped-miR828b	PeCNL12	3.5	-1	1	22	1672	1693	UCUUGCUCAAAUGAGUAUUCCA	:: :.:::::::.:::.:	UCAAACAUUCAUUUGGGCAGGC	Cleavage		1
ped-miR157a-5p	PeCNL16	4	-1	1	21	1685	1705	UUGACAGAAGAUAGAGAGCAC	::.: :: ::.::.::::::	AUGUUGUCAAUUUUUUGUCAA	Cleavage		2
ped-miR157a-5p	PeCNL12	4	-1	1	21	333	353	UUGACAGAAGAUAGAGAGCAC	:::.::: :::::: :.::	AAGCUUUCUCUCUUCUCUUAA	Cleavage		1
ped-miR395a	PeCNL17	4	-1	1	21	1305	1325	CUGAAGUGUUUGGGGGAACUC	: ::..:::::. :::::::	UAUUUUUCCCAAGGACUUCAG	Cleavage		1
ped-miR156a-5p	PeCNL12	4.5	-1	1	20	333	352	UGACAGAAGAGAGUGAGCAC	:::. ::::::::: :.:	AAGCUUUCUCUCUUCUCUUA	Cleavage		1
ped-miR157a-5p	PeCNL17	4.5	-1	1	21	336	356	UUGACAGAAGAUAGAGAGCAC	:::.:.: :::::: :.::	CAGCUUUUUCUCUUCUCUUAA	Cleavage		1
ped-miR167e	PeCNL14	4.5	-1	1	21	1808	1828	UGAAGCUGCCAGCAUGAUCUU	::::. :.: :::::::::	CAGAUUUGGUUUGCAGCUUCA	Translation		1
ped-miR167e	PeCNL13	4.5	-1	1	21	1808	1828	UGAAGCUGCCAGCAUGAUCUU	::::. :.: :::::::::	CAGAUUUGGUUUGCAGCUUCA	Translation		1
ped-miR171k-5p	PeCNL11	4.5	-1	1	21	1687	1707	CGAUGUUGGUGAGGUUCAAUC	::: : : ::..::::.::::	GAUGGCAACUUGCCAAUAUCG	Cleavage		1
ped-miR319b	PeCNL3	4.5	-1	1	21	1888	1908	UUGGACUGAAGGGAGCUCCCU	:: : :::.:::.::::: :	CGGAAACUCUCUUUAGUCCUA	Cleavage		1
ped-miR319l	PeCNL3	4.5	-1	1	22	1887	1908	UUGGACUGAAGGGAGCUCCUUC	: .: : :::.:::.::::: :	GCGGAAACUCUCUUUAGUCCUA	Cleavage		1
ped-miR319p	PeCNL20	4.5	-1	1	21	1160	1180	UUUUGGACUGAAGGGAGCUCC	: ::::. :::.: ::..:::	GAAGCUUGCUUUAUUCUGAAA	Cleavage		1
ped-miR393a-5p	PeCNL22	4.5	-1	1	22	2137	2158	UCCAAAGGGAUCGCAUUGAUCC	: :::: ::::::. .:::::	GUAUCACUGCGAUUAUUUUGGC	Cleavage		1
ped-miR156a-5p	PeCNL17	5	-1	1	20	336	355	UGACAGAAGAGAGUGAGCAC	:::. .:::::::: :.:	CAGCUUUUUCUCUUCUCUUA	Cleavage		1
ped-miR156a-5p	PeCNL3	5	-1	1	20	985	1004	UGACAGAAGAGAGUGAGCAC	: : :: :::: ::.:::::	GCGAUCUCUCUGUUUUGUCA	Cleavage		1
ped-miR156a-5p	PeCNL9	5	-1	1	20	384	403	UGACAGAAGAGAGUGAGCAC	: :: .:::.::::::..	AAGAUCCUUCUUUUCUGUUG	Cleavage		1
ped-miR157a-5p	PeCNL16	5	-1	1	21	330	350	UUGACAGAAGAUAGAGAGCAC	.:.: :::::::: :.::	ACAUUUUAUAUCUUCUCUUAA	Cleavage		2
ped-miR157a-5p	PeCNL21	5	-1	1	21	1770	1790	UUGACAGAAGAUAGAGAGCAC	.:::.:::: ::: ::::	CAAUUCUUUAUCAUCUCUCAA	Cleavage		1
ped-miR166a-5p	PeCNL9	5	-1	1	21	897	917	GGAAUGUUGUCUGGCUCGAGG	::.: ::..::..:::::.	GCUUGUGCUGGAUGACAUUUG	Cleavage		1
ped-miR166a-5p	PeCNL10	5	-1	1	21	813	833	GGAAUGUUGUCUGGCUCGAGG	::.: ::..::..:::::.	GCUUGUGCUGGAUGACAUUUG	Cleavage		1
ped-miR166a-5p	PeCNL11	5	-1	1	21	813	833	GGAAUGUUGUCUGGCUCGAGG	::.: ::..::..:::::.	GCUUGUGCUGGAUGACAUUUG	Cleavage		1
ped-miR166h-3p	PeCNL3	5	-1	1	21	427	447	UCUCGGACCAGGCUUCAUUCC	: .:::::: .:::: ::.:.	GCGAUGAAGAUUGGUGCGGGG	Cleavage		1
ped-miR166h-3p	PeCNL5	5	-1	1	21	1428	1448	UCUCGGACCAGGCUUCAUUCC	: :. :::::.:::::: .:	GAAGAGAAGCUUGGUCCAGGU	Cleavage		1
ped-miR166h-5p	PeCNL8	5	-1	1	21	1204	1224	GGAAUGUUGUUUGGCUCGAGG	.::: .:::::::..::.:	UCUCAUCUCAAACAAUGUUUC	Cleavage		1
ped-miR166h-5p	PeCNL19	5	-1	1	21	1243	1263	GGAAUGUUGUUUGGCUCGAGG	.::: .:::::::..::.:	UCUCAUCUCAAACAAUGUUUC	Cleavage		1
ped-miR166h-5p	PeCNL15	5	-1	1	21	1267	1287	GGAAUGUUGUUUGGCUCGAGG	.::: .:::::::..::.:	UCUCAUCUCAAACAAUGUUUC	Cleavage		1
ped-miR166h-5p	PeCNL18	5	-1	1	21	1279	1299	GGAAUGUUGUUUGGCUCGAGG	.::: .:::::::..::.:	UCUCAUCUCAAACAAUGUUUC	Cleavage		1
ped-miR171b-3p	PeCNL6	5	-1	1	21	586	606	UUGAGCCGUGCCAAUAUCACG	: :::.:::: ::: .::::	GGGGAUGUUGGAACGAUUCAA	Translation		1
ped-miR172b	PeCNL7	5	-1	1	21	1857	1877	UGAAUCUUGAUGAUGCUACAC	:::: :::::::: :::	CCGUAGAAUCAUCAAACUUCC	Cleavage		1
ped-miR172b	PeCNL6	5	-1	1	21	1122	1142	UGAAUCUUGAUGAUGCUACAC	:::: :::::::: :::	CCGUAGAAUCAUCAAACUUCC	Cleavage		1
ped-miR395a	PeCNL15	5	-1	1	21	1797	1817	CUGAAGUGUUUGGGGGAACUC	:: : : .::::::::: ::	UAGCUGCGUCAAACACUUGAG	Cleavage		1
