# Supplementary material for: Comparative genomics and bioinformatics approaches revealed the role of CC-NBS-LRR genes under multiple stresses in passion fruit
Source: Front Genet. 2024 Feb 26;15:1358134. doi: 10.3389/fgene.2024.1358134 (PMC10929019; doi:10.3389/fgene.2024.1358134)
Supplement: Supplementary file 8 [file Table7.XLSX]

## Sheet: Sheet1
qpid	ontology	goid	desc	ARGOT_score	ARGOT_PPV	ARGOT_rank	goclasscount
PeCNL3	BP	50832	defense response to fungus	11.673	0.800788	1	99
PeCNL3	MF	43531	ADP binding	9.88308	0.761171	1	99
PeCNL3	BP	7166	cell surface receptor signaling pathway	0.0726549	0.343838	12	1
PeCNL22	MF	43531	ADP binding	9.88307	0.76117	1	100
PeCNL22	BP	6952	defense response	7.14903	0.692931	1	100
PeCNL22	CC	16020	membrane	0.00876622	0.318295	1	1
PeCNL22	BP	51707	response to other organism	6.75506	0.682082	2	100
PeCNL22	MF	17018	myosin phosphatase activity	0.20201	0.369961	16	2
PeCNL22	MF	5524	ATP binding	0.0450792	0.335529	23	2
PeCNL15	MF	43531	ADP binding	9.88208	0.761147	1	15
PeCNL15	BP	6952	defense response	7.14831	0.692911	1	15
PeCNL15	BP	51707	response to other organism	6.75438	0.682063	2	15
PeCNL15	BP	15074	DNA integration	0.539411	0.411342	9	1
PeCNL15	MF	3676	nucleic acid binding	0.174413	0.36534	16	1
PeCNL15	MF	16787	hydrolase activity	0.135868	0.358221	17	1
PeCNL18	MF	43531	ADP binding	9.88201	0.761146	1	14
PeCNL18	BP	6952	defense response	7.14826	0.69291	1	14
PeCNL18	BP	51707	response to other organism	6.75433	0.682062	2	14
PeCNL18	BP	7165	signal transduction	0.329813	0.388087	10	1
PeCNL18	MF	17018	myosin phosphatase activity	0.957279	0.446765	15	1
PeCNL1	BP	50832	defense response to fungus	11.673	0.800787	1	100
PeCNL1	MF	43531	ADP binding	9.88304	0.76117	1	100
PeCNL1	CC	9536	plastid	0.0527512	0.338049	1	1
PeCNL1	BP	7166	cell surface receptor signaling pathway	0.0801986	0.34582	12	1
PeCNL9	MF	43531	ADP binding	9.88279	0.761164	1	41
PeCNL9	BP	6952	defense response	7.14882	0.692925	1	41
PeCNL9	CC	16020	membrane	0.0185833	0.324494	1	1
PeCNL9	BP	51707	response to other organism	6.75487	0.682077	2	41
PeCNL9	MF	5524	ATP binding	0.86629	0.439844	16	12
PeCNL9	MF	17018	myosin phosphatase activity	0.199754	0.369595	18	1
PeCNL10	MF	43531	ADP binding	9.88305	0.76117	1	100
PeCNL10	BP	6952	defense response	7.14901	0.69293	1	100
PeCNL10	CC	16020	membrane	0.00908845	0.318542	1	1
PeCNL10	BP	51707	response to other organism	6.75504	0.682082	2	100
PeCNL10	MF	5524	ATP binding	0.364966	0.392419	16	15
PeCNL10	MF	17018	myosin phosphatase activity	0.209412	0.371146	18	2
PeCNL11	MF	43531	ADP binding	9.88301	0.761169	1	76
PeCNL11	BP	6952	defense response	7.14898	0.69293	1	76
PeCNL11	CC	16020	membrane	0.0121442	0.320701	1	1
PeCNL11	BP	51707	response to other organism	6.75501	0.682081	2	76
PeCNL11	MF	5524	ATP binding	0.423784	0.399223	16	14
PeCNL11	MF	17018	myosin phosphatase activity	0.305706	0.384982	18	2
PeCNL12	MF	43531	ADP binding	9.88268	0.761161	1	32
PeCNL12	BP	6952	defense response	7.14874	0.692923	1	32
PeCNL12	CC	16020	membrane	0.0179947	0.324178	1	1
PeCNL12	BP	51707	response to other organism	6.75479	0.682075	2	32
PeCNL12	MF	17018	myosin phosphatase activity	0.349173	0.3905	16	1
PeCNL12	MF	5524	ATP binding	0.228842	0.37416	19	3
PeCNL4	MF	43531	ADP binding	9.88295	0.761168	1	72
PeCNL4	BP	6952	defense response	6.97917	0.688291	1	71
PeCNL4	BP	51707	response to other organism	6.43815	0.673123	2	70
PeCNL4	MF	5524	ATP binding	0.500417	0.407415	16	12
PeCNL4	MF	30246	carbohydrate binding	0.0833422	0.346618	18	1
PeCNL8	MF	43531	ADP binding	9.88018	0.761104	1	5
PeCNL8	BP	6952	defense response	7.14693	0.692874	1	5
PeCNL8	BP	51707	response to other organism	6.75308	0.682027	2	5
PeCNL25	MF	43531	ADP binding	9.88306	0.76117	1	99
PeCNL25	BP	6952	defense response	6.93538	0.687086	1	96
PeCNL25	CC	5886	plasma membrane	0.193209	0.368523	1	7
PeCNL25	BP	51707	response to other organism	4.03862	0.596499	4	55
PeCNL25	CC	5737	cytoplasm	0.0200243	0.325247	4	1
PeCNL25	BP	98581	detection of external biotic stimulus	1.19274	0.463277	12	7
PeCNL25	MF	5524	ATP binding	1.55886	0.485989	13	50
PeCNL25	BP	51702	biological process involved in interaction with symbiont	1.0153	0.451006	16	7
PeCNL25	MF	17018	myosin phosphatase activity	0.138448	0.358727	18	1
PeCNL25	MF	16860	intramolecular oxidoreductase activity	0.100235	0.35067	21	1
PeCNL25	BP	12501	programmed cell death	0.685495	0.424918	22	7
PeCNL25	MF	16705	oxidoreductase activity, acting on paired donors, with incorporation or reduction of molecular oxygen	0.0851654	0.347074	23	1
PeCNL25	BP	6955	immune response	0.62144	0.419163	24	7
PeCNL25	MF	5515	protein binding	0.050673	0.337385	27	1
PeCNL25	BP	33554	cellular response to stress	0.371014	0.393143	28	7
PeCNL25	BP	16109	tetraterpenoid biosynthetic process	0.135545	0.358157	30	1
PeCNL25	BP	16116	carotenoid metabolic process	0.133643	0.357781	33	1
PeCNL25	BP	46148	pigment biosynthetic process	0.0955516	0.349583	36	1
PeCNL16	MF	43531	ADP binding	9.88229	0.761152	1	17
PeCNL16	BP	6952	defense response	7.14846	0.692915	1	17
PeCNL16	BP	51707	response to other organism	6.75452	0.682067	2	17
PeCNL6	MF	43531	ADP binding	9.88227	0.761152	1	19
PeCNL6	BP	6952	defense response	7.14844	0.692915	1	19
PeCNL6	CC	9507	chloroplast	0.578287	0.415118	1	2
PeCNL6	BP	51707	response to other organism	2.06877	0.513544	5	6
PeCNL6	MF	16787	hydrolase activity	0.242746	0.376239	16	2
PeCNL5	MF	43531	ADP binding	9.88308	0.76117	1	97
PeCNL5	BP	6952	defense response	7.14903	0.692931	1	97
PeCNL5	CC	16020	membrane	0.00995225	0.319185	1	1
PeCNL5	BP	51707	response to other organism	5.66868	0.650407	2	82
PeCNL5	MF	17018	myosin phosphatase activity	0.226386	0.373786	16	2
PeCNL5	MF	5524	ATP binding	0.0287009	0.329299	25	1
PeCNL2	MF	43531	ADP binding	9.88309	0.761171	1	98
PeCNL2	BP	6952	defense response	7.14903	0.692931	1	98
PeCNL2	CC	5634	nucleus	0.110385	0.352942	1	3
PeCNL2	BP	51707	response to other organism	6.62347	0.678388	2	96
PeCNL2	CC	5886	plasma membrane	0.0249175	0.32762	7	1
PeCNL2	BP	50776	regulation of immune response	0.238622	0.375629	13	3
PeCNL2	MF	43621	protein self-association	0.396907	0.396177	16	3
PeCNL2	MF	16887	ATP hydrolysis activity	0.300242	0.384261	17	6
PeCNL2	MF	5524	ATP binding	0.179837	0.366275	24	6
PeCNL2	MF	17018	myosin phosphatase activity	0.118147	0.354609	27	1
PeCNL7	MF	43531	ADP binding	9.8827	0.761162	1	33
PeCNL7	BP	6952	defense response	6.69617	0.680433	1	31
PeCNL7	CC	9507	chloroplast	1.36743	0.474493	1	9
PeCNL7	BP	51707	response to other organism	1.43248	0.478485	5	7
PeCNL7	MF	16787	hydrolase activity	0.165346	0.363742	16	2
PeCNL7	MF	5524	ATP binding	0.122203	0.355458	17	2
PeCNL17	MF	43531	ADP binding	9.88227	0.761152	1	17
PeCNL17	BP	6952	defense response	7.14845	0.692915	1	17
PeCNL17	BP	51707	response to other organism	6.75451	0.682067	2	17
PeCNL17	BP	7165	signal transduction	0.218533	0.372577	10	1
PeCNL17	MF	5524	ATP binding	0.477444	0.405029	16	3
PeCNL24	MF	43531	ADP binding	9.88305	0.76117	1	98
PeCNL24	BP	6952	defense response	7.14901	0.69293	1	98
PeCNL24	BP	51707	response to other organism	6.27636	0.668465	2	93
PeCNL24	BP	70475	rRNA base methylation	0.0793135	0.345592	10	1
PeCNL24	MF	17018	myosin phosphatase activity	0.137197	0.358482	16	1
PeCNL24	MF	70042	rRNA (uridine-N3-)-methyltransferase activity	0.123088	0.355642	18	1
PeCNL20	MF	43531	ADP binding	9.8822	0.76115	1	18
PeCNL20	BP	6952	defense response	7.14839	0.692914	1	18
PeCNL20	BP	51707	response to other organism	6.75446	0.682065	2	18
PeCNL20	MF	17018	myosin phosphatase activity	0.678965	0.424344	16	1
PeCNL21	BP	50832	defense response to fungus	11.673	0.800786	1	97
PeCNL21	MF	43531	ADP binding	9.88301	0.761169	1	97
PeCNL21	BP	7166	cell surface receptor signaling pathway	0.294528	0.383501	12	4
PeCNL19	MF	43531	ADP binding	9.88109	0.761125	1	8
PeCNL19	BP	6952	defense response	7.14759	0.692892	1	8
PeCNL19	BP	51707	response to other organism	6.7537	0.682044	2	8
PeCNL19	BP	7165	signal transduction	0.548206	0.412207	10	1
PeCNL13	MF	43531	ADP binding	9.88223	0.761151	1	15
PeCNL13	BP	6952	defense response	7.14842	0.692914	1	15
PeCNL13	BP	51707	response to other organism	6.75448	0.682066	2	15
PeCNL13	MF	17018	myosin phosphatase activity	0.803537	0.434858	16	1
PeCNL14	MF	43531	ADP binding	9.88235	0.761154	1	16
PeCNL14	BP	6952	defense response	7.14851	0.692917	1	16
PeCNL14	BP	51707	response to other organism	6.75457	0.682068	2	16
PeCNL14	MF	17018	myosin phosphatase activity	0.677612	0.424225	16	1
